# Supplementary material for: Parents’ Personality-Disorder Symptoms Predict Children’s Symptoms of Anxiety and Depressive Disorders – a Prospective Cohort Study
Source: Springer Nature journal article supplement (doi:10.1007/s10802-019-00568-9), 2019-06-13
Supplement: MOESM1 [file 16809090]

**Supporting Online Information for *Parents’ Personality-Disorder Symptoms Predict Children’s Symptoms of Anxiety and Depressive Disorders– A Prospective Cohort Study***

**Comment**

**Random, fixed and hybrid effects models**

Variables can be time-invariant such as genetics and gender (i.e., do not change over time) or *time-varying*, such as mental health and family-situation (i.e., variables that do change over time) (For further details, see (Wichstrom et al. 2017a; Wichstrom et al. 2017b)). In fixed effects models, the effects of time-varying predictors (e.g., Parental PD symptoms) are adjusted for the confounding effect of time-invariant factors, which in the current study indicates that what causes stability in participant’s symptoms of anxiety and depression is partialled out by correlating parental PD symptoms (i.e., the predictors) with the time-invariant factor. This is a procedure that corresponds to the way confounders are adjusted for in ordinary regression. Of note, fixed effects regression utilizes within-person variation (i.e., participants serve as their own control). Random effects models, on the other hand, use both within- and between-person information and therefore have more statistical power. However, a basic assumption in random effects models is that the predictors are uncorrelated with the time-invariant factor(s). Such models are therefore only appropriate when predictors are uncorrelated with the time-invariant factor(s) and setting these correlations to 0 does not deteriorate the fit of the model. If the assumption for a random effects model is unmet (i.e., there are indeed some significant correlations between the predictor and the time-invariant factor), hybrid models can be estimated. In hybrid models, which consists of both fixed and random effects (Firebaugh et al. 2013), some predictors are set to correlate with the time-invariant factor(s), whereas other predictors are not. The advantage of hybrid models is that they adjust for time-invariant factors (when these may influence the results, i.e., there are significant correlations between the time-invariant factor and the predictor) while being more parsimonious and more statistically powerful than pure fixed effects models (Allison 2009; Firebaugh et al. 2013).

**Results of the sensitivity analyses**

**Table S1.** Sensitivity analyses: Children’s symptoms of anxiety and depressive disorders (PD) at ages 6 and 8 years predicted from parents’ symptoms of specific personality disorders two years earlier. Hybrid fixed and random effects models (Model 5, Supplementary Table 2) (N=594).

| Parents’ personality  disorder symptoms | Children’s symptoms of  anxiety disorders | | | Children’s symptoms of depressive disorders | | |
| --- | --- | --- | --- | --- | --- | --- |
|  | B | *p* | 95% CI | B | *p* | 95% CI |
| Cluster A PD symptoms |  |  |  |  |  |  |
| Paranoid PD | -.02 | .750 | -.15, .11 | -.03 | .529 | -.11, .06 |
| Schizotypal PD | .10 | .029 | .01, .19 | .04 | .185 | -.02, .10 |
| Schizoid PD | -.05 | .298 | -.15, .05 | .02 | .695 | -.07, .11 |
| Cluster B PD symptoms |  |  |  |  |  |  |
| Antisocial PD | -.06 | .200 | -.16, .03 | -.05 | .236 | -.12, .03 |
| Borderline PD | .05 | .157 | -.02, .11 | .05 | .026 | .01, .10 |
| Histrionic PD | .08 | .123 | -.02, .18 | .05 | .176 | -.02, .12 |
| Narcissistic PD | .02 | .658 | -.07, .11 | .01 | .830 | -.06, .07 |
| Cluster C PD symptoms |  |  |  |  |  |  |
| Avoidant PD | .05 | .159 | -.02, .11 | .03 | .313 | -.02, .08 |
| Dependent PD | .04 | .398 | -.05, .13 | .08 | .026 | .01, .14 |
| Obsessive compulsive PD | .08 | .006 | .02, .14 | .02 | .355 | -.02, .06 |

**Table S2.** Results of model-fitting procedures–sensitivity analyses.

|  | Χ2 | df | P-value | ΔΧ2 | df | P-value | RMSEAa (95% CI) | SRMRb | CFIc | TLId |
| --- | --- | --- | --- | --- | --- | --- | --- | --- | --- | --- |
| **Cluster A PDs (sumscores of paranoid, schizotypal, schizoid PDs)** |  |  |  |  |  |  |  |  |  |  |
| M1: Baseline model | 1245.34 | 84 | ≤.001 |  |  |  |  |  |  |  |
| M2: Random effects | 93.86 | 30 | ≤.001 |  |  |  | .06 (.05, .07) | .05 | .945 | .846 |
| M3: Fixed effects | 50.78 | 22 | ≤.001 | 49.97 | 8 | ≤.000 | .05 (.03, .06) | .03 | .975 | .905 |
| M4: Hybrid model with random and fixed effects | 60.98 | 28 | ≤.001 | 8.01 | 6 | .238 | .05 (.03, .06) | .03 | .972 | .915 |
| **M5: M4 with fixed effects of parents’ Cluster A PD sum score on children’s anxiety and depression symptoms, constraining the paths from age 6 to 8 and from age 8 to 10 to be equal** | **67.03** | **34** | **≤.001** | **5.76** | **6** | **.451** | **.04 (.03, .06)** | **.03** | **.972** | **.930** |
| **Cluster B PDs (sum scores of antisocial, borderline, histrionic and narcissistic PDs)** |  |  |  |  |  |  |  |  |  |  |
| M1: Baseline model | 1154.68 | 108 | ≤.001 |  |  |  |  |  |  |  |
| M2: Random effects | 97.73 | 37 | ≤.001 |  |  |  | .05 (.04, .07) | .04 | .942 | .831 |
| M3: Fixed effects | 57.99 | 27 | ≤.001 | 48.91 | 10 | ≤.000 | .04 (.03, .06) | .03 | .970 | .882 |
| M4: Hybrid model with random and fixed effects | 68.15 | 35 | ≤.001 | 4.22 | 8 | .837 | .04 (.03, .05) | .03 | .968 | .902 |
| **M5: M4 with fixed effects of parents’ Cluster B PD sum score on children’s anxiety and depression symptoms, constraining the paths from age 6 to 8 and from age 8 to 10 to be equal** | **69. 93** | **34** | **≤.001** | **6.01** | **8** | **.646** | **.04 (.03, .06)** | **.04** | **.964** | **.912** |
| **Cluster C PDs (sum scores of avoidant, dependent and obsessive-compulsive PDs)** |  |  |  |  |  |  |  |  |  |  |
| M1: Baseline model | 1092.38 | 84 | ≤.001 |  |  |  |  |  |  |  |
| M2: Random effects | 94.40 | 30 | ≤.001 |  |  |  | .06 (.05, .07) | .05 | .936 | .821 |
| M3: Fixed effects | 59.02 | 22 | ≤.001 | 39.63 | 8 | ≤.000 | .05 .04, .07) | .04 | .963 | .860 |
| M4: Hybrid model with random and fixed effects | 68.34 | 28 | ≤.001 | 4.90 | 6 | .557 | .05 (.04, .06) | .04 | .960 | .880 |
| **M5: M4 with fixed effects of parents’ Cluster C PD sum score on children’s anxiety and depression symptoms, constraining the paths from age 6 to 8 and from age 8 to 10 to be equal** | **69.93** | **34** | **≤.001** | **1.24** | **6** | **.975** | **.04 (.03, .06)** | **.04** | **.964** | **.912** |

*Note*. All models are nested and compared with the next model (i.e., random models are compared with fixed models, fixed models are compared with hybrid models); Δχ2 is

corrected according to Satorra-Bentler’s procedure; preferred model in bold. a The baseline model is an unstructured model (null model/null hypothesis) assuming zero covariation

between the observed variables; b Root mean square error of approximation; c Standardized root mean square residual; d Comparative fit index; e Tucker Lewis index.

**References**

Allison, P. D. (2009). *Fixed effects regression models* (Vol. 160, Quantitative Applications in the Social Sciences). Thousand Oaks, CA: Sage Publications Inc.

Firebaugh, G., Warner, C., & Massoglia, M. (2013). Fixed Effects, Random Effects, and Hybrid Models for Causal Analysis. In S. L. Morgan (Ed.), *Handbook of Causal Analysis for Social Research* (pp. 113-132). Dordrecht: Springer Science+Business Media.

Wichstrom, L., Belsky, J., & Steinsbekk, S. (2017a). Homotypic and heterotypic continuity of symptoms of psychiatric disorders from age 4 to 10 years: a dynamic panel model. *Journal of Child Psychology and Psychiatry and Allied Disciplines*, doi:10.1111/jcpp.12754.

Wichstrom, L., Penelo, E., Rensvik Viddal, K., de la Osa, N., & Ezpeleta, L. (2017b). Explaining the relationship between temperament and symptoms of psychiatric disorders from preschool to middle childhood: hybrid fixed and random effects models of Norwegian and Spanish children. *Journal of Child Psychology and Psychiatry and Allied Disciplines*, doi:10.1111/jcpp.12772.
